# Supplementary material for: Dietary Patterns Associated with Lower 10-Year Atherosclerotic Cardiovascular Disease Risk among Urban African-American and White Adults Consuming Western Diets
Source: MDPI journal article supplement (doi:10.3390/nu10020158), 2018-01-31
Supplement: s1 [file s1]

Table S1: Percent of individuals with at least one report of uniquely coded food by food group over two 24-hour dietary recall days ( $n = 2140$ ).

| Group Number | Food Group                                | %    |
|--------------|-------------------------------------------|------|
| 1            | Breads, grains, and cereals               |      |
|              | Refined breads/grains                     | 53.9 |
|              | 100% whole wheat breads/grains            | 2.1  |
|              | Whole grain cooked cereals/crackers       | 2.4  |
|              | Pasta                                     | 32.7 |
|              | Rice                                      | 17.7 |
|              | Cooked cereals                            | 15.0 |
|              | Ready-to-Eat cereals                      | 30.9 |
| 2            | Savory snacks                             |      |
|              | Savory snacks, regular                    | 57.2 |
|              | Reduced fat snacks                        | 1.1  |
| 3            | Sweet bakery products                     |      |
|              | Cakes, donuts, pastries                   | 49.9 |
|              | Diet cakes/pastries/cookies               | 0.5  |
|              | Fruit desserts                            | 4.6  |
| 4            | Fruit, excludes citrus fruit              |      |
|              | Fruit                                     | 46.4 |
|              | Berries                                   | 2.9  |
|              | Dried Fruit                               | 1.6  |
| 5            | Citrus fruit                              | 27.5 |
| 6            | Dark green and orange vegetables          |      |
|              | Dark green vegetables                     | 21.2 |
|              | Orange vegetables                         | 10.7 |
| 7            | Potatoes and other starchy vegetables     | 56.4 |
| 8            | Other vegetables                          | 45.9 |
| 9            | Milk                                      |      |
|              | Regular milk                              | 9.5  |
|              | Reduced fat and fat-free milk             | 10.8 |
| 10           | Cheese and yogurt                         |      |
|              | Natural, regular cheese                   | 2.6  |
|              | Natural, reduced fat cheese               | 0.7  |
|              | Processed cheese                          | 2.3  |
|              | Processed reduced fat cheese              | 0    |
|              | Reg dairy products                        | 5.6  |
|              | Low fat dairy products                    | 7.1  |
| 11           | Dairy desserts                            |      |
|              | Dairy desserts, regular                   | 19   |
|              | Low fat and fat-free dairy desserts       | 2.7  |
| 12           | Meats                                     |      |
|              | Red meats, Lean only eaten                | 14.8 |
|              | Red meats, Lean and fat eaten             | 15.1 |
| 13           | Poultry                                   |      |
|              | Chicken/turkey prepared with no added fat | 10.4 |
|              | Chicken/poultry prepared with added fat   | 40.6 |
| 14           | Seafood                                   |      |
|              | Fin fish prepared with no fat             | 3.8  |
|              | Fin fish prepared with added fat          | 10.1 |

|    |                                                                |      |
|----|----------------------------------------------------------------|------|
|    | Shellfish                                                      | 9.4  |
| 15 | Mixed dishes - Sandwiches                                      | 71.1 |
| 16 | Cured meats                                                    | 29.4 |
| 17 | Mixed dishes- Meats, Poultry, Seafood, Mexican American, Asian |      |
|    | Meat dishes                                                    | 30.7 |
|    | Diet frozen meals                                              | 0.8  |
| 18 | Soups                                                          | 16.3 |
| 19 | Eggs and egg dishes                                            | 44.5 |
| 20 | Legumes                                                        | 12.7 |
| 21 | Pizza                                                          | 13.6 |
| 22 | Coffee, tea, water                                             | 88.2 |
| 23 | Sweetened beverages                                            | 81.4 |
| 24 | Diet beverages                                                 | 30.8 |
| 25 | Alcoholic beverages                                            | 22.2 |
| 26 | Candy and sugar                                                |      |
|    | Sugar                                                          | 3.2  |
|    | Sugar substitute                                               | 0.7  |
|    | Candy                                                          | 43.9 |
| 27 | Nuts and nut butters                                           | 17.1 |

Table S2: Characteristics of Healthy Aging in Neighborhoods of Diversity across the Life Span Study Participants with 10-year risk for Atherosclerotic Cardiovascular Disease (ASCVD), 2009-2013 (n=1358).

| Characteristics                      | Men                                   |                         |          | Women                                 |                         |          | P<br>Comparison<br>by race |
|--------------------------------------|---------------------------------------|-------------------------|----------|---------------------------------------|-------------------------|----------|----------------------------|
|                                      | African<br>American<br><i>n</i> = 336 | White<br><i>n</i> = 235 | <i>p</i> | African<br>American<br><i>n</i> = 453 | White<br><i>n</i> = 334 | <i>p</i> |                            |
| <b>Demographic</b>                   |                                       |                         |          |                                       |                         |          |                            |
| Age, yrs, X±SEM                      | 53.3±0.4                              | 54.0±0.5                | 0.281    | 54.1±0.4                              | 54.2±0.4                | 0.849    | 0.397                      |
| Income, %<125%<br>poverty            | 39.3%                                 | 24.7%                   | <0.001   | 47.0%                                 | 32.9%                   | <0.001   | <0.001                     |
| Literacy, %<8 <sup>th</sup><br>grade | 45.9%                                 | 25.7%                   | <0.001   | 44.1%                                 | 23.4%                   | <0.001   | <0.001                     |
| Education, yrs,<br>X±SEM             | 12.3±0.2                              | 12.9±0.2                | 0.030    | 12.4±0.1                              | 12.9±0.2                | 0.035    | 0.002                      |
| <b>Lifestyle</b>                     |                                       |                         |          |                                       |                         |          |                            |
| Current Smokers,<br>%                | 63.8%                                 | 39.0%                   | <0.001   | 47.0%                                 | 38.8%                   | 0.003    | <0.001                     |
| <b>Health</b>                        |                                       |                         |          |                                       |                         |          |                            |
| BMI, kg/m <sup>2</sup> ,<br>X±SEM    | 27.6±0.3                              | 29.5±0.5                | 0.001    | 32.0±0.4                              | 30.8±0.5                | 0.037    | 0.797                      |
| 10-yr ASCVD risk,<br>X±SEM           | 10.6±.4                               | 8.7±0.5                 | 0.001    | 7.02±0.35                             | 4.38±0.24               | <0.001   | <0.001                     |
| <b>Dietary</b>                       |                                       |                         |          |                                       |                         |          |                            |
| Energy, kcal,<br>X±SEM               | 2368±55                               | 2432±58                 | 0.430    | 1796±33                               | 1821±37                 | 0.622    | 0.478                      |
| Protein, gm/kg,<br>X±SEM             | 1.09±0.03                             | 1.05±0.03               | 0.306    | 0.86±0.02                             | 0.87±0.02               | 0.781    | 0.539                      |
| Protein, % energy                    | 15.7±0.2                              | 15.3±0.3                | 0.298    | 15.7±0.2                              | 14.9±0.2                | 0.010    | 0.008                      |
| Carbohydrate, %<br>energy            | 47.3±0.5                              | 47.3±0.7                | 0.996    | 48.6±0.4                              | 50.5±0.6                | .007     | 0.035                      |
| Sugar, % energy                      | 23.2±0.5                              | 22.3±0.7                | 0.290    | 24.3±0.4                              | 24.7±0.6                | 0.664    | 0.764                      |
| Total fat, %<br>energy               | 34.9±0.4                              | 35.3±0.5                | 0.651    | 35.1±0.3                              | 33.9±0.4                | 0.030    | 0.175                      |

|                                |          |          |                  |          |          |                  |                  |
|--------------------------------|----------|----------|------------------|----------|----------|------------------|------------------|
| SFA, % energy                  | 10.9±0.2 | 11.6±0.2 | <b>&lt;0.001</b> | 10.7±0.1 | 11.5±0.2 | <b>0.001</b>     | <b>&lt;0.001</b> |
| MUFA, % energy                 | 12.8±0.2 | 12.7±0.2 | 0.776            | 12.6±0.1 | 11.8±0.2 | <b>&lt;0.001</b> | <b>0.002</b>     |
| PUFA, % energy                 | 8.1±0.2  | 7.5±0.2  | <b>0.024</b>     | 8.5±0.1  | 7.6±0.2  | <b>&lt;0.001</b> | <b>&lt;0.001</b> |
| HEI-2010, X±SEM                | 45.5±0.6 | 45.0±0.8 | 0.606            | 47.3±0.5 | 47.6±0.8 | 0.811            | 0.933            |
| MAR, X±SEM                     | 78.7±0.7 | 82.1±0.7 | <b>0.001</b>     | 75.3±0.7 | 77.6±0.8 | <b>0.030</b>     | <b>&lt;0.001</b> |
| DASH adherence,<br>%           | 2.4%     | 3.8%     | 0.316            | 4.6%     | 11.7%    | <b>&lt;0.001</b> | <b>&lt;0.001</b> |
| Supplements<br>users, %        | 34.1%    | 45.3%    | <b>0.008</b>     | 50.9%    | 53.5%    | 0.477            | <b>0.022</b>     |
| Food insecure <sup>1</sup> , % | 30.7%    | 28.7%    | 0.648            | 33.0 %   | 28.0%    | 0.178            | 0.187            |

Abbreviations: CVD = cardiovascular disease, ASCVD = Atherosclerotic Cardiovascular Disease Risk, SFA = saturated fatty acids, MUFA = monounsaturated fatty acids, PUFA = polyunsaturated fatty acids, HEI = Healthy Eating Index, MAR = Mean Adequacy Ratio, DASH = Dietary Approaches to Stop Hypertension. NOTE: 10-year ASCVD risk based on 2013 ACC/AHA Guideline [33]. <sup>1</sup>Defined by affirmative response to question: Did you eat less because of insufficient money for food in the past month?

**Table S3: Comparison of food group consumption by lower or upper tertile of 10-year atherosclerotic cardiovascular disease (ASCVD) risk.**

| Food Group                                            | Lower ASCVD Risk<br>Tertile<br><i>n</i> = 452 | Upper ASCVD Risk<br>Tertile<br><i>n</i> = 452 | <i>p</i>      |
|-------------------------------------------------------|-----------------------------------------------|-----------------------------------------------|---------------|
|                                                       | <i>Energy, % of total</i>                     | <i>Energy, % of total</i>                     |               |
| Eggs                                                  | 3.83±0.29                                     | 5.57±0.37                                     | <b>0.0002</b> |
| Vegetables, excludes dark green ,orange and potatoes  | 2.92±0.25                                     | 1.84±0.18                                     | <b>0.0004</b> |
| Mixed dishes - Sandwiches                             | 12.92±0.58                                    | 15.48±0.67                                    | <b>0.0039</b> |
| Cheese and yogurt                                     | 1.49±0.18                                     | 0.84±0.15                                     | <b>0.0058</b> |
| Cured meats                                           | 1.50±0.17                                     | 2.23±0.22                                     | <b>0.0088</b> |
| Pizza                                                 | 3.25±0.41                                     | 2.13±0.35                                     | <b>0.0380</b> |
| Candy and sugars                                      | 2.36±0.25                                     | 1.75±0.17                                     | <b>0.0454</b> |
| Sweet bakery products                                 | 5.56±0.40                                     | 6.74±0.44                                     | <b>0.0477</b> |
| Mixed dishes –Meats, Poultry, Seafood, Mexican, Asian | 4.81±0.38                                     | 3.86±0.39                                     | <b>0.0851</b> |
| Meats                                                 | 1.94±0.22                                     | 2.50±0.24                                     | <b>0.0871</b> |
| Sweetened beverages                                   | 11.57±0.54                                    | 10.45±0.45                                    | 0.1103        |
| Coffee, tea, water                                    | 0.27±0.08                                     | 0.15±0.03                                     | 0.1571        |
| Legumes                                               | 1.31±0.21                                     | 1.00±0.16                                     | 0.2474        |
| Diet beverages                                        | 0.49±0.06                                     | 0.60±0.08                                     | 0.2620        |
| Nuts and Nut Butters                                  | 1.88±0.26                                     | 1.51±0.22                                     | 0.2739        |
| Breads, grains, and cereals                           | 15.43±0.65                                    | 14.52±0.59                                    | 0.2954        |
| Soups                                                 | 1.44±0.23                                     | 1.15±0.19                                     | 0.3389        |
| Alcoholic beverages                                   | 3.50±0.39                                     | 3.03±0.35                                     | 0.3705        |
| Potatoes and other starchy vegetables                 | 3.95±0.28                                     | 4.28±0.26                                     | 0.3941        |
| Poultry                                               | 5.24±0.37                                     | 5.64±0.44                                     | 0.4809        |
| Fruit excludes citrus fruit                           | 3.10±0.26                                     | 3.31±0.25                                     | 0.5586        |
| Citrus fruit                                          | 1.26±0.15                                     | 1.37±0.15                                     | 0.6229        |
| Milk                                                  | 1.69±0.23                                     | 1.54±0.20                                     | 0.6356        |
| Dark green and orange vegetables                      | 0.87±0.11                                     | 0.81±0.10                                     | 0.6416        |
| Savory Snacks                                         | 4.55±0.31                                     | 4.40±0.33                                     | 0.7392        |
| Seafood                                               | 2.07±0.25                                     | 2.19±0.28                                     | 0.7648        |
| Dairy desserts                                        | 2.11±0.27                                     | 2.21±0.26                                     | 0.7804        |

Table S4: Characteristics of HANDLS study participants in lower and upper tertiles of 10-year atherosclerotic cardiovascular disease risk by dietary pattern ( $n = 904$ )

| Dietary Pattern                       | n   | Energy/gm food <sup>1</sup> | Protein<br>% Energy <sup>2</sup> | Carbohydrate<br>% Energy <sup>3</sup> | Fat<br>% Energy <sup>4</sup> | Women,<br>% <sup>5</sup> | AA,<br>% <sup>6</sup> | <125%<br>Poverty, % <sup>7</sup> |
|---------------------------------------|-----|-----------------------------|----------------------------------|---------------------------------------|------------------------------|--------------------------|-----------------------|----------------------------------|
| DP1<br>Sandwiches/Bakery<br>Products  | 601 | 1.47±0.02 <sup>a</sup>      | 15.01±0.17 <sup>a</sup>          | 48.55±0.39 <sup>a</sup>               | 35.34±0.30 <sup>a</sup>      | 60.2 <sup>a,d</sup>      | 62.1 <sup>a</sup>     | 40.9 <sup>a</sup>                |
| DP2<br>Meats/Sandwiches               | 98  | 1.29±0.06 <sup>b</sup>      | 18.63±0.57 <sup>b</sup>          | 45.36±0.11 <sup>b</sup>               | 33.04±0.79 <sup>b</sup>      | 49.05 <sup>c</sup>       | 64.3 <sup>a</sup>     | 39.8 <sup>a,b</sup>              |
| DP3<br>Sandwiches/Other<br>Vegetables | 124 | 1.25±0.04 <sup>b</sup>      | 15.95±0.37 <sup>a</sup>          | 48.48±0.88 <sup>a,b</sup>             | 35.16±0.63 <sup>a,b</sup>    | 79.03 <sup>b</sup>       | 47.6 <sup>b</sup>     | 29.0 <sup>b</sup>                |
| DP4<br>Pizza/Sandwiches               | 81  | 1.60±0.05 <sup>a</sup>      | 15.12±0.33 <sup>a</sup>          | 48.71±0.97 <sup>a,b</sup>             | 35.21±0.75 <sup>a,b</sup>    | 63.05 <sup>a,c,d</sup>   | 48.1 <sup>b</sup>     | 32.1 <sup>a,b</sup>              |

Abbreviations: HANDLS = Healthy Aging in Neighborhoods of Diversity across the Life Span, DP = Dietary Pattern, AA = African American. <sup>1</sup>Superscripts with different letters within a column are significantly different. For energy density, DP1 is significantly different from DP2 ( $p = 0.008$ ) and DP3 ( $p < 0.001$ ). DP4 is significantly different from DPs 2 and 3 ( $p < 0.001$ ). <sup>2</sup>For protein as percentage of energy, DP2 is significantly difference from DPs 1, 3 and 4 ( $p < 0.001$ ). <sup>3</sup>For carbohydrates as percentage of energy DP2 is significantly different from DP1 ( $p = 0.017$ ). <sup>4</sup>For total fat as percentage of energy DP2 is significantly different from DP1 ( $p = 0.023$ ). <sup>5</sup>For sex, the percentage of women in DP3 is significantly higher than DP1 ( $p < 0.001$ ), DP2 ( $p < 0.001$ ) and DP4 ( $p = 0.012$ ). The proportion of women in DP2 is significantly lower than DP1 ( $p = 0.036$ ). <sup>6</sup>For race, the percent of African Americans in DP3 is significantly lower than DPs 1 ( $p = 0.003$ ) and 2 ( $p = 0.013$ ). The percent of African Americans in DP4 is significantly lower than DPs 1 ( $p = 0.016$ ) and 2 ( $p = 0.030$ ). <sup>7</sup>Fewer participants in DP3 have income <125% poverty guidelines than DP1 ( $p = 0.013$ )
